# Supplementary material for: Why is the electroanalytical performance of carbon paste electrodes involving an ionic liquid binder higher than paraffinic binders? A simulation investigation
Source: Royal Society of Chemistry journal article supplement (doi:10.1039/c5cp02683k), 2015-01-01
Supplement: c5cp02683k1.pdf [file c5cp02683k1.pdf]

### *Supplementary Information*

## **Why is the electroanalytical performance of carbon paste electrodes involving ionic liquid binder higher than paraffinic binders? a simulation investigation**

Mohammad Hadi Ghatee<sup>\*1</sup>, Sedigheh Namvar<sup>1</sup>, Amin Reza Zolghadr<sup>1</sup>, Fatemeh Moosavi<sup>2</sup>

Tel: +98 711 613 7174, Fax: +98 711 228 6008, E-mail: [ghatee@susc.ac.ir](mailto:ghatee@susc.ac.ir)

<sup>1</sup>Department of Chemistry, Shiraz University, Shiraz, 71946, Iran

<sup>2</sup>Department of Chemistry, Ferdowsi University of Mashhad, Mashhad 91779, Iran

**Table S1.** Atomic charges calculation by using the GAUSSIAN 03 at the B3LYP/6-311G for [C<sub>4</sub>mim]PF<sub>6</sub>.

| atom            | charge | atom            | charge |
|-----------------|--------|-----------------|--------|
| N <sub>1</sub>  | -0.357 | H <sub>2</sub>  | 0.203  |
| C <sub>2</sub>  | 0.327  | H <sub>4</sub>  | 0.204  |
| N <sub>3</sub>  | -0.355 | H <sub>5</sub>  | 0.277  |
| C <sub>4</sub>  | -0.019 | H <sub>6</sub>  | 0.225  |
| C <sub>5</sub>  | -0.017 | H <sub>7</sub>  | 0.227  |
| C <sub>6</sub>  | -0.357 | H <sub>8</sub>  | 0.237  |
| C <sub>7</sub>  | -0.157 | H <sub>9</sub>  | 0.182  |
| C <sub>8</sub>  | -0.399 | H <sub>10</sub> | 0.201  |
| C <sub>9</sub>  | -0.381 | P               | 2.554  |
| C <sub>10</sub> | -0.569 | F               | -0.587 |

**Table S2.** Atomic charges calculations by using the GAUSSIAN 03 at the B3LYP/6-311G for C<sub>20</sub>H<sub>42</sub>.

| atom             | charge | atom            | charge |
|------------------|--------|-----------------|--------|
| C <sub>P1</sub>  | -0.658 | H <sub>1</sub>  | 0.137  |
| C <sub>P2</sub>  | -0.217 | H <sub>2</sub>  | 0.127  |
| C <sub>P3</sub>  | -0.278 | H <sub>3</sub>  | 0.118  |
| C <sub>P4</sub>  | -0.128 | H <sub>4</sub>  | 0.121  |
| C <sub>P5</sub>  | -0.066 | H <sub>5</sub>  | 0.123  |
| C <sub>P6</sub>  | -0.183 | H <sub>6</sub>  | 0.124  |
| C <sub>P7</sub>  | -0.345 | H <sub>7</sub>  | 0.125  |
| C <sub>P8</sub>  | -0.322 | H <sub>8</sub>  | 0.125  |
| C <sub>P9</sub>  | -0.273 | H <sub>9</sub>  | 0.124  |
| C <sub>P10</sub> | -0.164 | H <sub>10</sub> | 0.124  |

**Table S3.** The distance of closest approach (Å): [C<sub>4</sub>mim]PF<sub>6</sub> intercalated between graphite charged plates.

| atoms of ionic liquid | distance of closet approach |       |       |       |
|-----------------------|-----------------------------|-------|-------|-------|
|                       | C_1                         | C_106 | C_512 | C_556 |
| N <sub>1</sub>        | 4.85                        | 5.55  | 5.95  | 6.25  |
| C <sub>2</sub>        | 4.65                        | 5.25  | 5.65  | 6.85  |
| N <sub>3</sub>        | 4.55                        | 5.45  | 4.85  | 7.45  |
| C <sub>4</sub>        | 3.55                        | 4.75  | 5.05  | 7.75  |
| C <sub>5</sub>        | 3.95                        | 4.45  | 5.65  | 6.85  |
| C <sub>6</sub>        | 3.85                        | 5.25  | 4.65  | 7.95  |
| C <sub>7</sub>        | 6.35                        | 5.05  | 6.85  | 5.25  |
| C <sub>10</sub>       | 4.25                        | 4.55  | 7.45  | 4.55  |
| P                     | 4.45                        | 4.55  | 4.75  | 6.05  |
| F                     | 3.25                        | 3.55  | 3.45  | 5.05  |

**Table S4.** The distance of closest approach (Å): *n*-C<sub>20</sub>H<sub>42</sub> atoms intercalated between graphite charged plates.

| atoms of paraffin | distance of closest approach |       |       |       |
|-------------------|------------------------------|-------|-------|-------|
|                   | C_1                          | C_106 | C_512 | C_556 |
| C <sub>P1</sub>   | 3.25                         | 3.25  | 3.45  | 3.35  |
| C <sub>P10</sub>  | 3.55                         | 3.55  | 3.65  | 3.75  |

**Table S5.** The distance of closest approach (Å): [C<sub>4</sub>mim]PF<sub>6</sub> placed on graphite uncharged plates.

| IL atoms        | graphite atoms |       |       |       |
|-----------------|----------------|-------|-------|-------|
|                 | C_1            | C_106 | C_512 | C_556 |
| N <sub>1</sub>  | 4.35           | 6.35  | 6.75  | 5.75  |
| C <sub>2</sub>  | 4.65           | 5.75  | 6.65  | 7.05  |
| N <sub>3</sub>  | 5.35           | 4.55  | 7.05  | 7.55  |
| C <sub>4</sub>  | 5.45           | 4.35  | 6.25  | 8.05  |
| C <sub>5</sub>  | 4.55           | 5.45  | 5.75  | 5.65  |
| C <sub>6</sub>  | 4.75           | 3.75  | 7.55  | 8.05  |
| C <sub>7</sub>  | 3.75           | 7.05  | 6.95  | 5.25  |
| C <sub>10</sub> | 3.45           | 8.35  | 6.45  | 3.75  |
| P               | 4.35           | 4.95  | 8.35  | 7.75  |
| F               | 3.35           | 3.65  | 6.85  | 6.65  |

**Table S6.** The distance of closest approach (Å): [C<sub>4</sub>mim]PF<sub>6</sub> intercalated between graphite uncharged plates.

| atoms of ionic liquid | distance of closet approach |       |       |       |
|-----------------------|-----------------------------|-------|-------|-------|
|                       | C_1                         | C_106 | C_512 | C_556 |
| N <sub>1</sub>        | 6.35                        | 3.85  | 6.35  | 6.55  |
| C <sub>2</sub>        | 6.85                        | 4.25  | 6.75  | 6.35  |
| N <sub>3</sub>        | 6.25                        | 3.85  | 7.75  | 6.65  |
| C <sub>4</sub>        | 5.05                        | 3.45  | 7.95  | 8.25  |
| C <sub>5</sub>        | 5.05                        | 3.45  | 7.95  | 8.25  |
| C <sub>6</sub>        | 5.45                        | 4.75  | 8.45  | 6.15  |
| C <sub>7</sub>        | 5.35                        | 4.75  | 5.05  | 5.65  |
| C <sub>10</sub>       | 5.65                        | 4.05  | 4.05  | 3.75  |
| P                     | 4.55                        | 5.25  | 5.85  | 5.85  |
| F                     | 3.25                        | 4.05  | 4.65  | 4.45  |

**Table S7.** The distance of closest approach (Å): *n*-C<sub>20</sub>H<sub>42</sub> placed on graphite uncharged plates.

| atoms of paraffin | distance of closest approach |       |       |       |
|-------------------|------------------------------|-------|-------|-------|
|                   | C_1                          | C_106 | C_512 | C_556 |
| C <sub>P1</sub>   | 3.35                         | 3.45  | 3.55  | 3.55  |
| C <sub>P10</sub>  | 6.65                         | 3.55  | 3.65  | 7.65  |

**Table S8.** The distance of closest approach (Å):  $n$ -C<sub>20</sub>H<sub>42</sub> atoms intercalated between graphite uncharged plates.

| atoms of paraffin | distance of closest approach |       |       |       |
|-------------------|------------------------------|-------|-------|-------|
|                   | C_1                          | C_106 | C_512 | C_556 |
| C <sub>P1</sub>   | 3.45                         | 3.45  | 3.55  | 3.55  |
| C <sub>P10</sub>  | 3.55                         | 3.55  | 3.25  | 3.55  |

**IL on Graphite Charged Plates: Figures S1-S8**

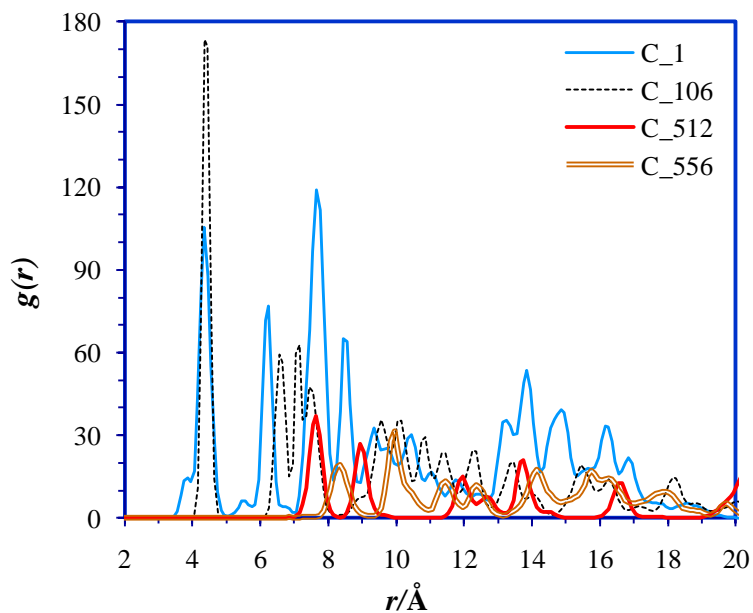

**Figure S1.** Pair correlation functions (at 323 K) between C<sub>2</sub> atom of IL monolayer and carbon atoms at different locations on double-C<sub>600</sub> graphite charged plates.

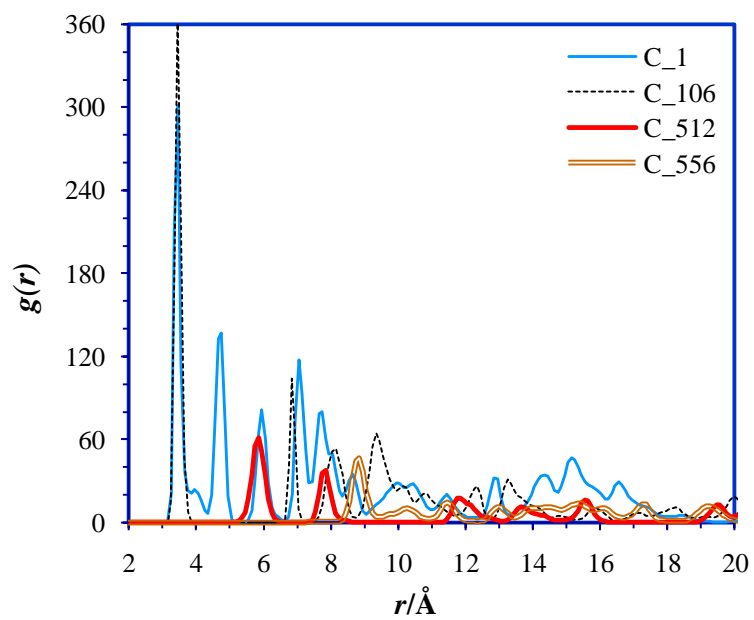

**Figure S2.** The same as Figure S1, but for C<sub>4</sub> atom.

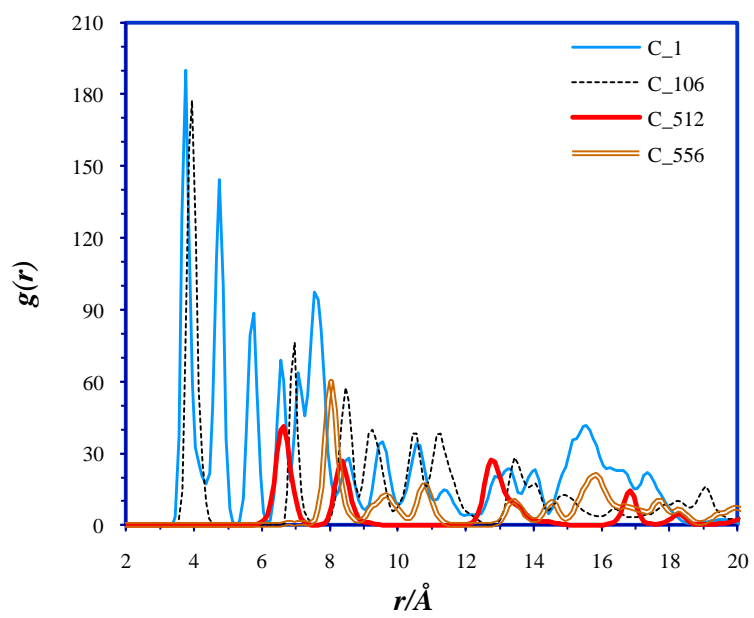

**Figure S3.** The same as Figure S1, but for C<sub>5</sub> atom.

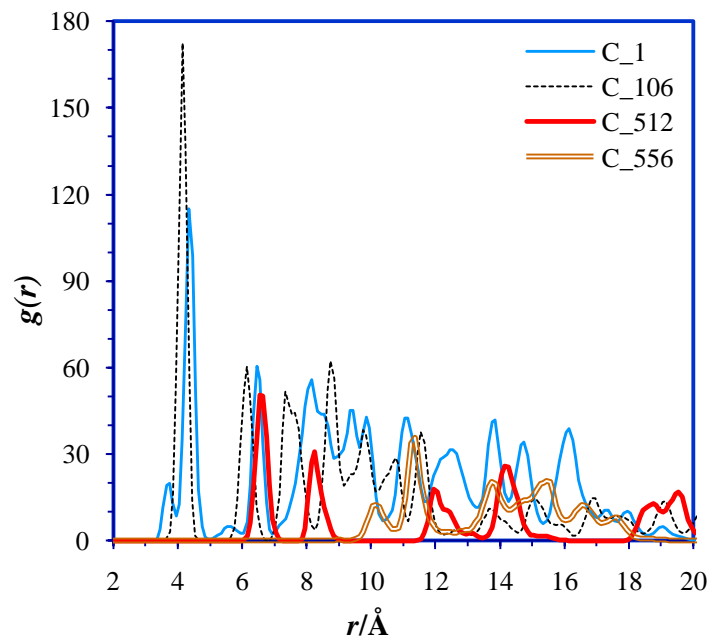

**Figure S4.** The same as Figure S1, but for C<sub>6</sub> atom.

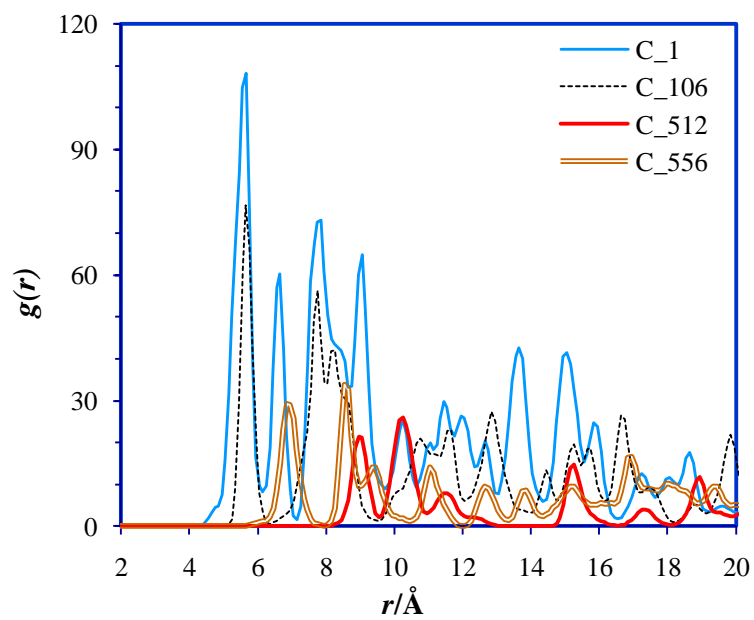

**Figure S5.** The same as Figure S1, but for C<sub>7</sub> atom.

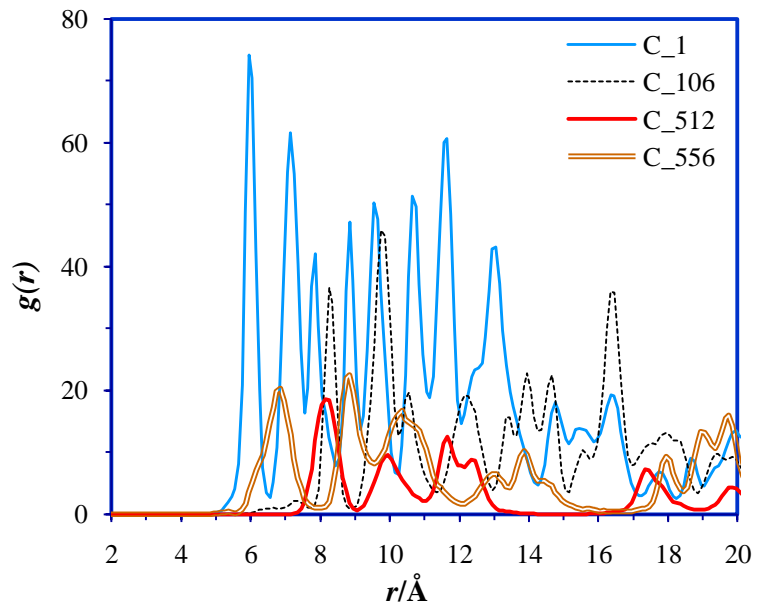

**Figure S6.** The same as Figure S1, but for C<sub>10</sub> atom.

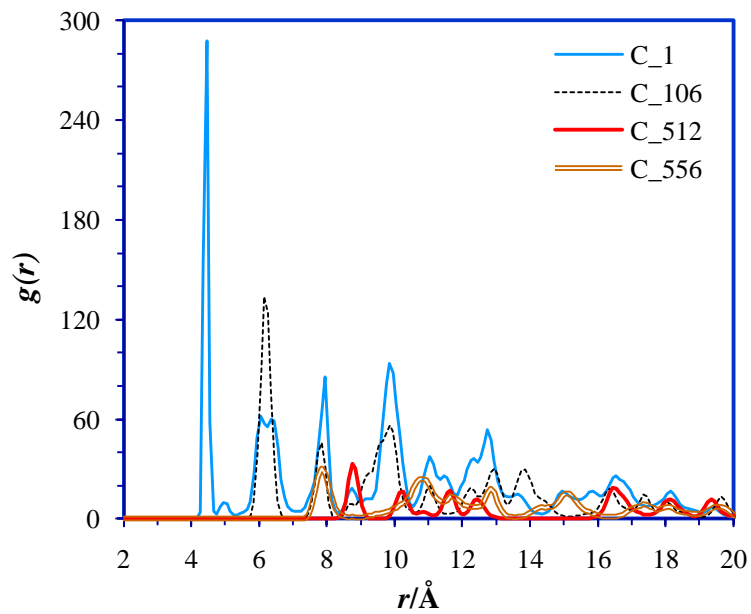

**Figure S7.** The same as Figure S1, but for P atom.

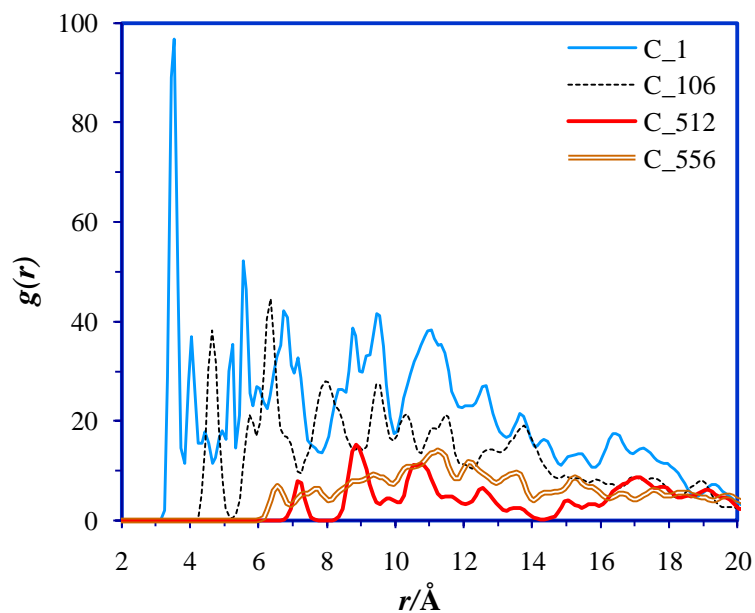

**Figure S8.** The same as Figure S1, but for F atom.

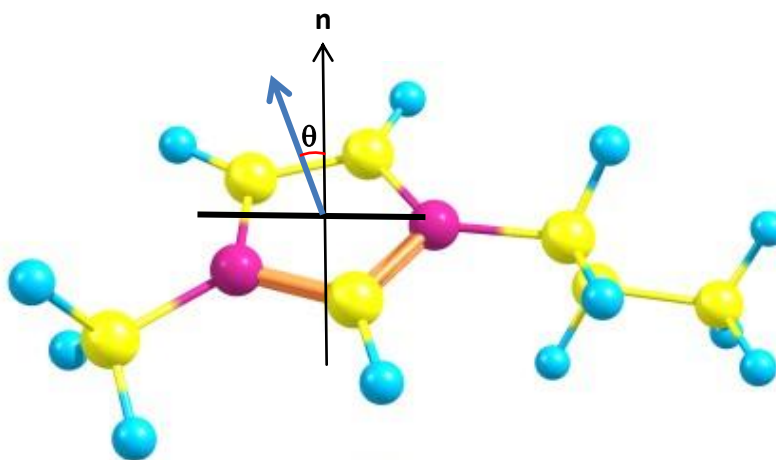

**Figure S9.** The average orientation of the imidazolium ring plane with respect to graphite surface (of the double- $C_{600}$ ). ( $\theta$ ) is the angle between normal of charged graphite plate ( $\mathbf{n}$ ) and normal of the imidazolium ring plane.



IL Intercalated between Graphite Charged Plates: Figures S10-S19

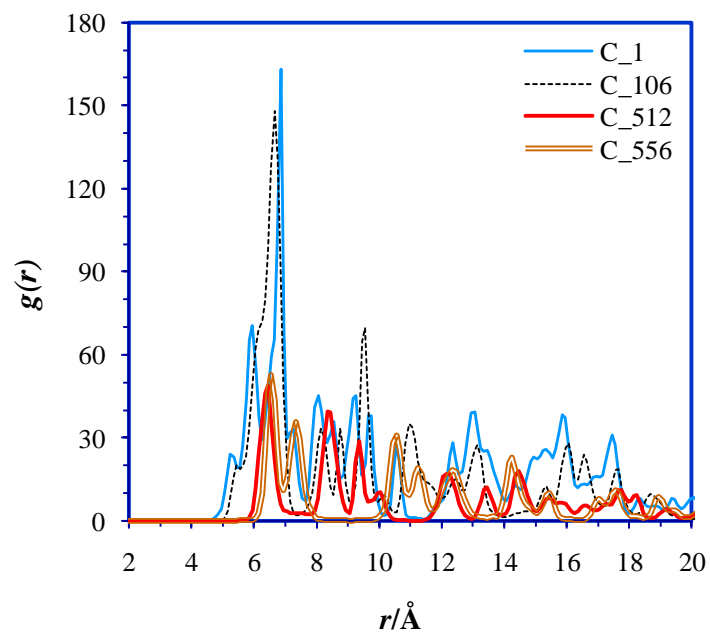

**Figure S10.** Pair correlation functions (at 323 K) between  $N_1$  atom of IL monolayer and carbon atoms at different locations in between double- $C_{600}$  graphite charged plates.

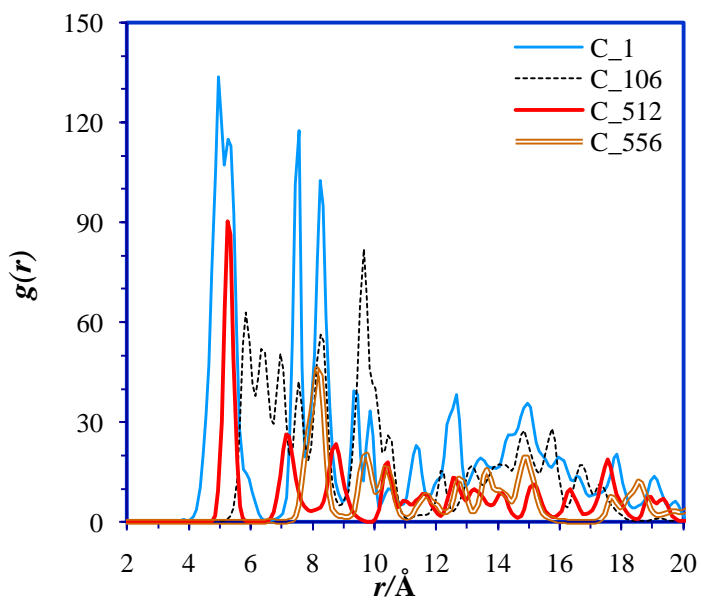

**Figure S11.** The same as Figure S10, but for  $N_3$ .

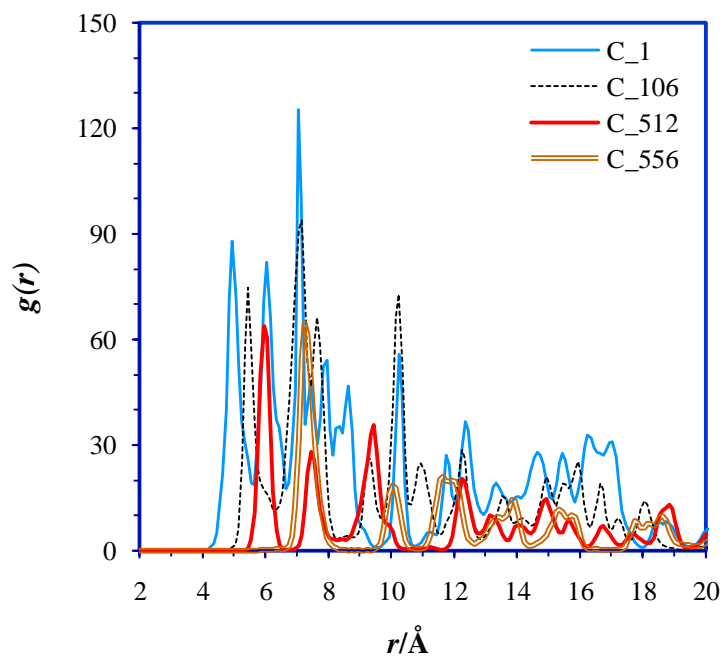

**Figure S12.** The same as Figure S10, but for  $C_2$ .

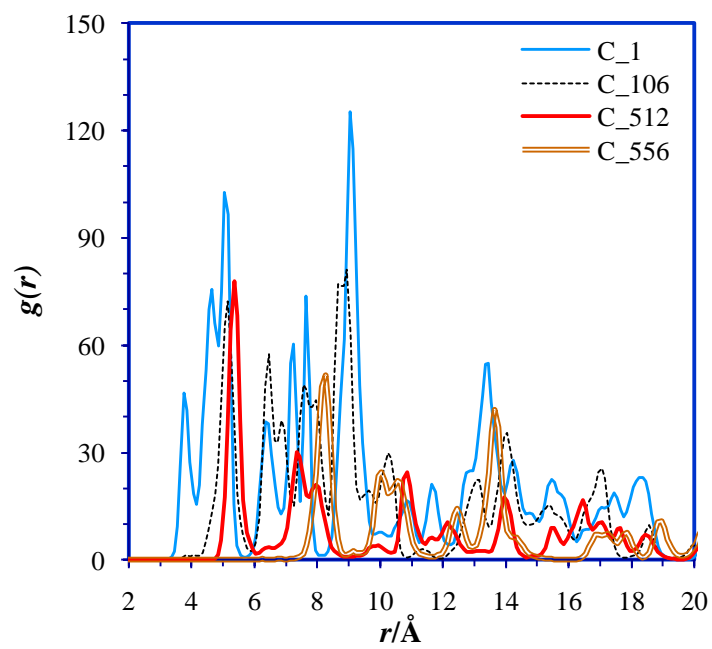

**Figure S13.** The same as Figure S10, but for  $C_4$ .

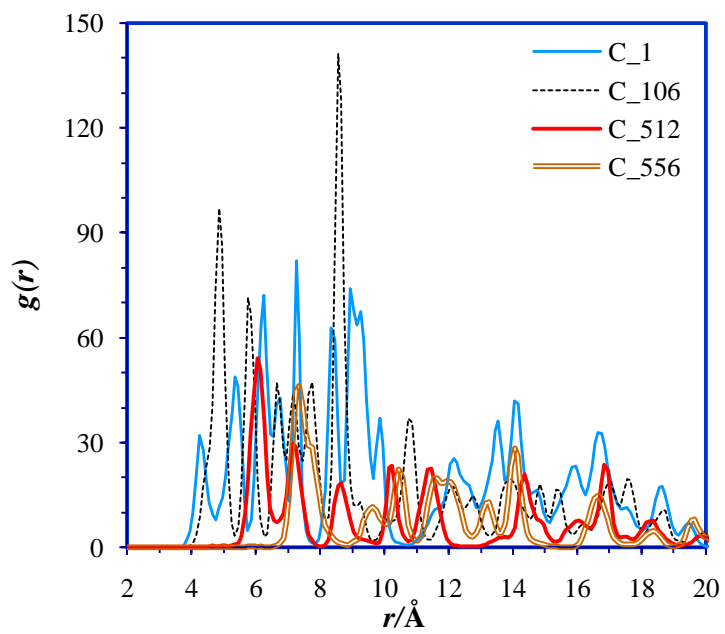

**Figure S14.** The same as Figure S10, but for  $C_5$ .

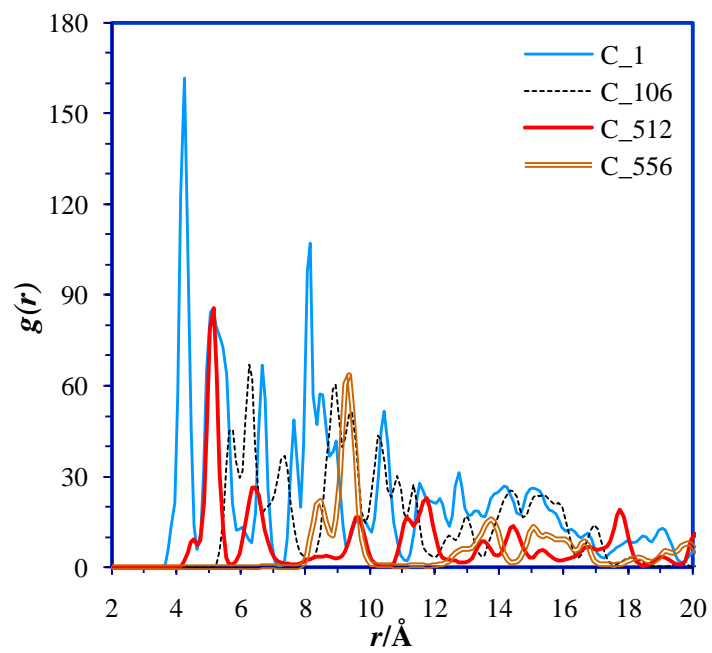

**Figure S15.** The same as Figure S10, but for  $C_6$ .

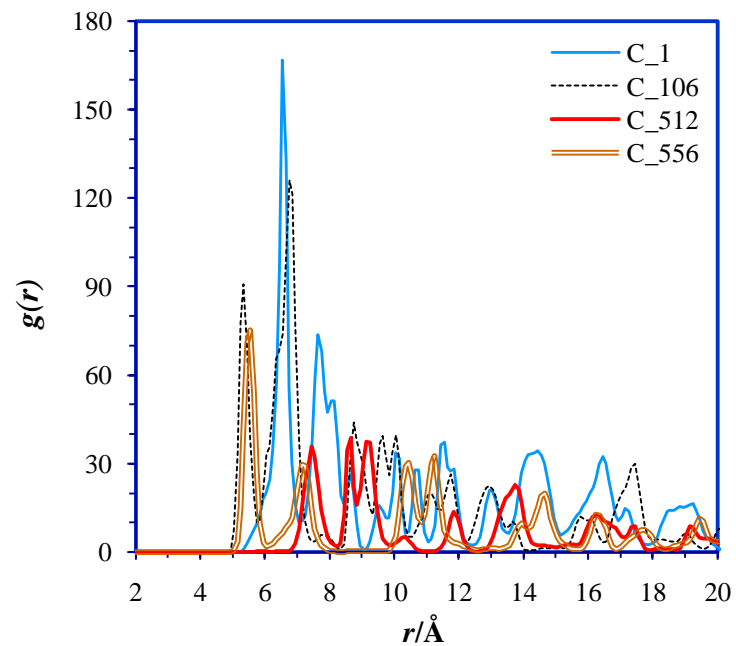

**Figure S16.** The same as Figure S10, but for  $C_7$ .

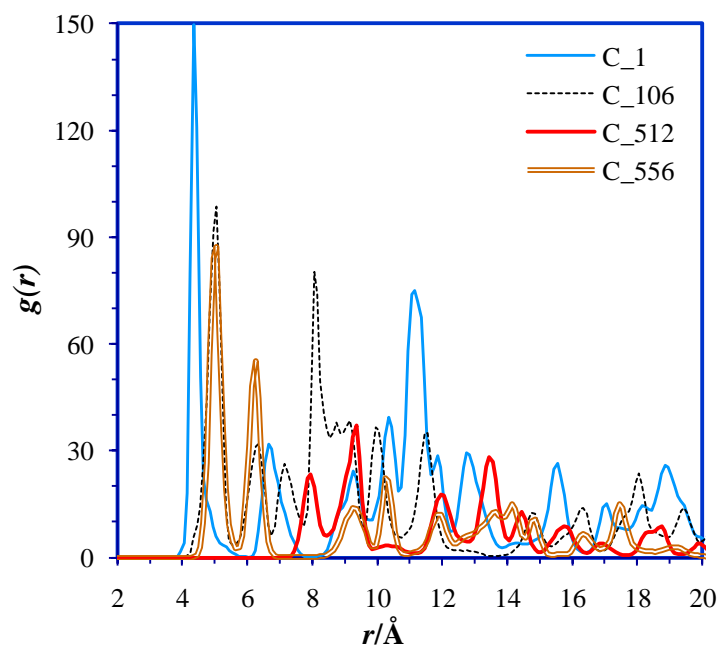

**Figure S17.** The same as Figure S10, but for  $C_{10}$ .

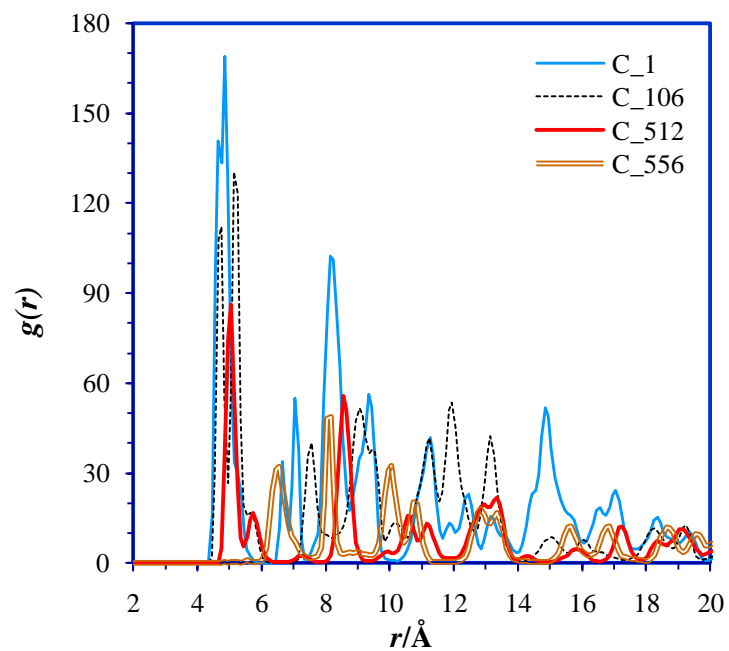

**Figure S18.** The same as Figure S10, but for P.

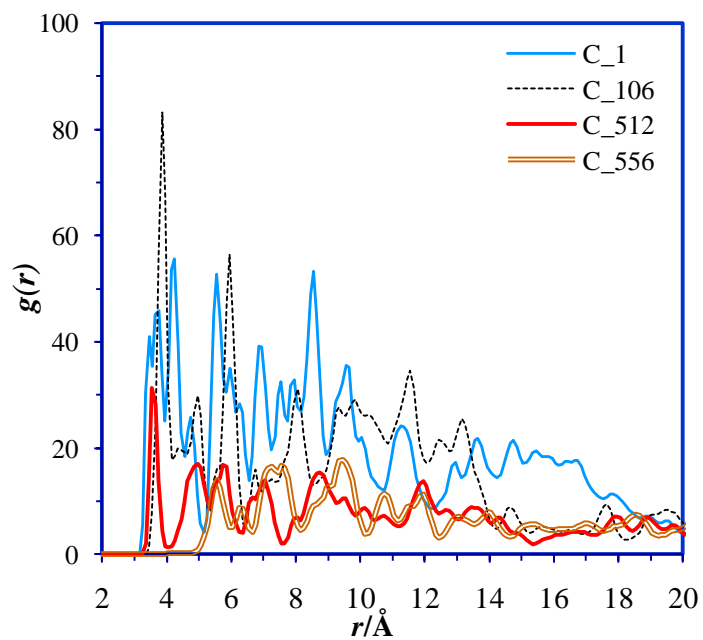

**Figure S19.** The same as Figure S10, but for F.

Paraffin Intercalated between Graphite Charged Plates: Figures S20 and S21

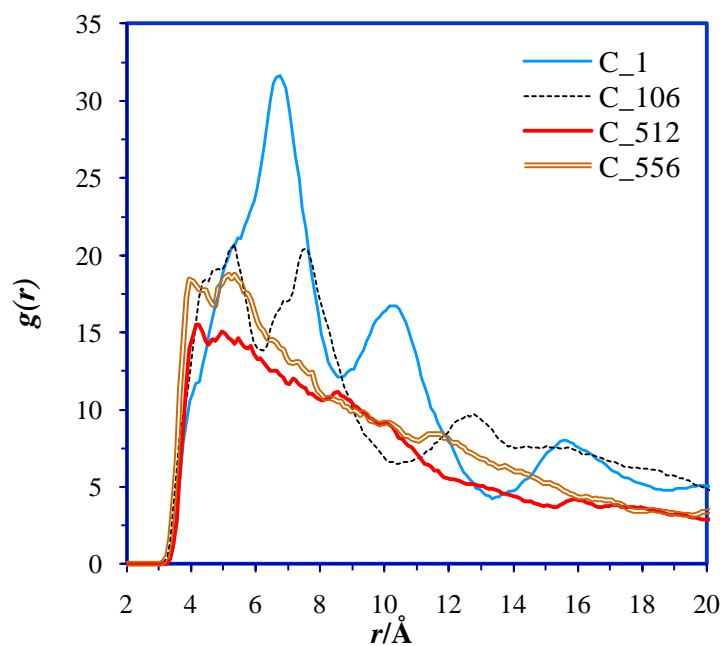

Figure S20. Pair correlation functions (at 323 K) between  $C_{P1}$  atom of paraffine and carbon atoms at different locations in between double- $C_{600}$  graphite charged plates.

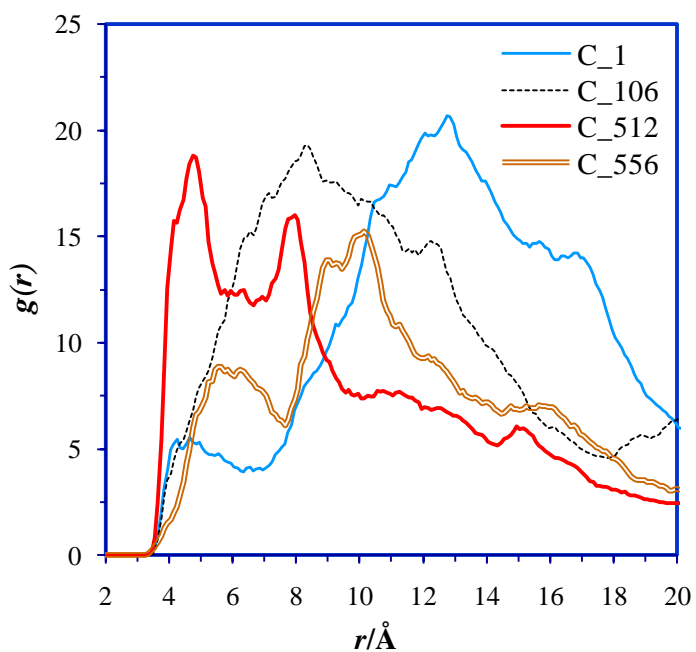

Figure S21. The same as Figure S20, but for  $C_{P10}$ .

IL on Graphite Uncharged Plates: Figures 22-31

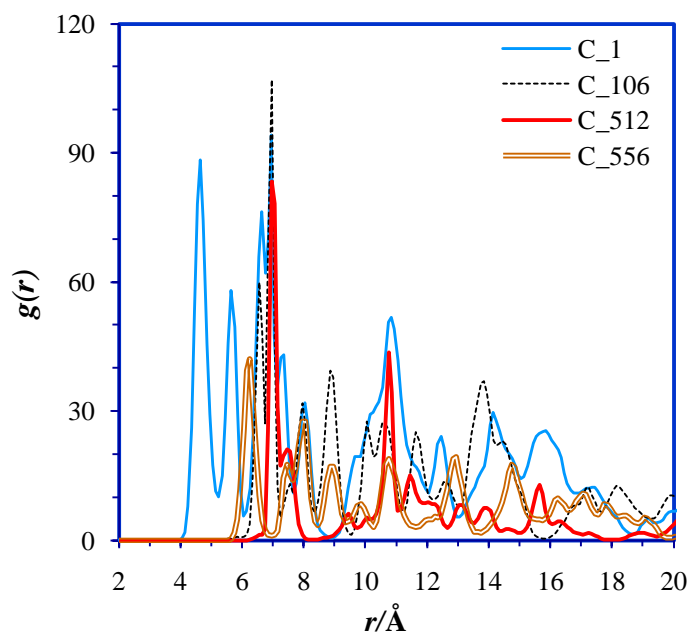

**Figure S22.** Pair correlation functions (at 323 K) between  $N_1$  atom of monolayer IL and carbon atoms at different locations on double- $C_{600}$  graphite uncharged plates.

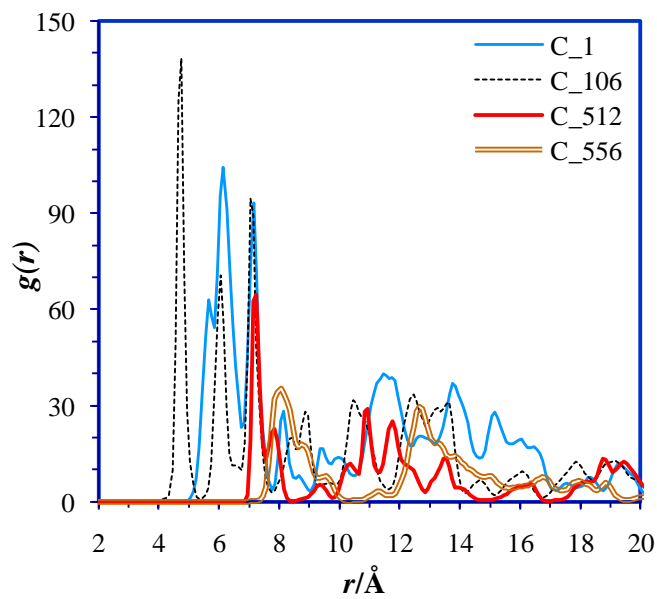

**Figure S23.** The same as Figure S22, but for  $N_3$ .

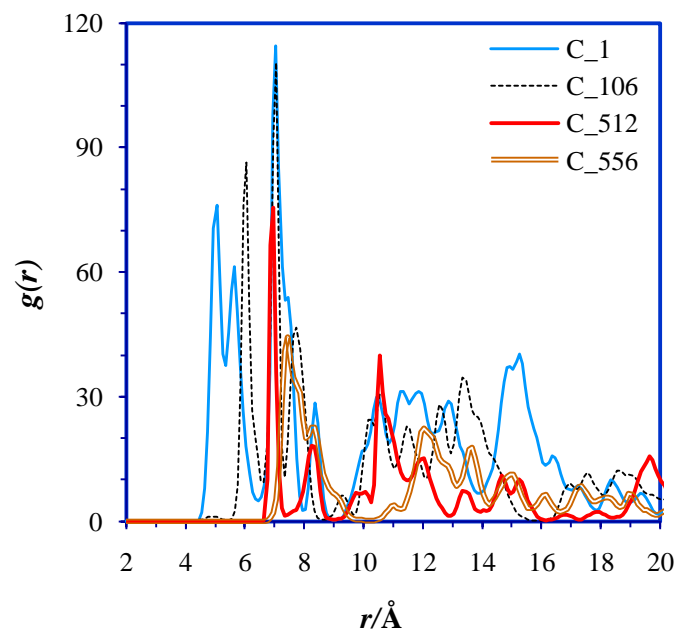

**Figure S24.** The same as Figure S22, but for C<sub>2</sub>.

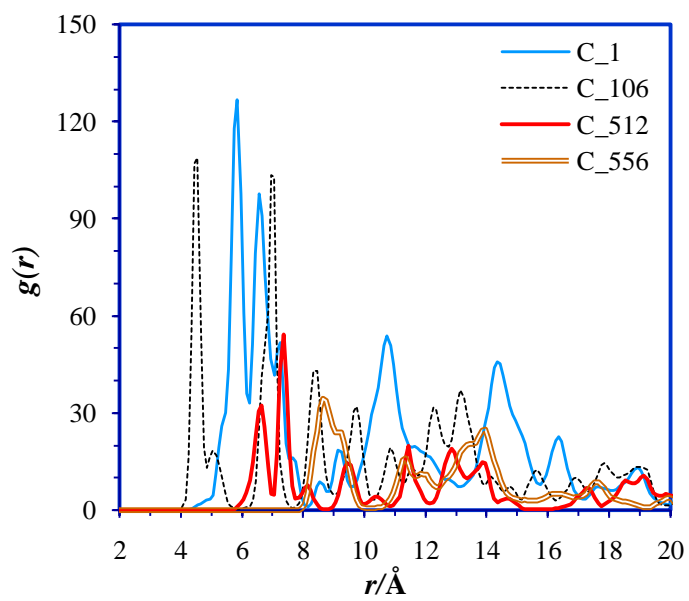

**Figure S25.** The same as Figure S22, but for C<sub>4</sub>.



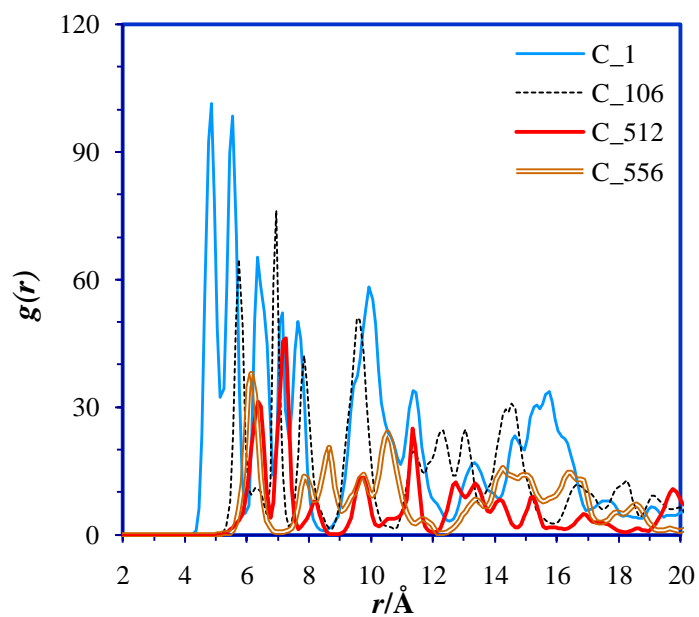

**Figure S26.** The same as Figure S22, but for  $C_5$ .

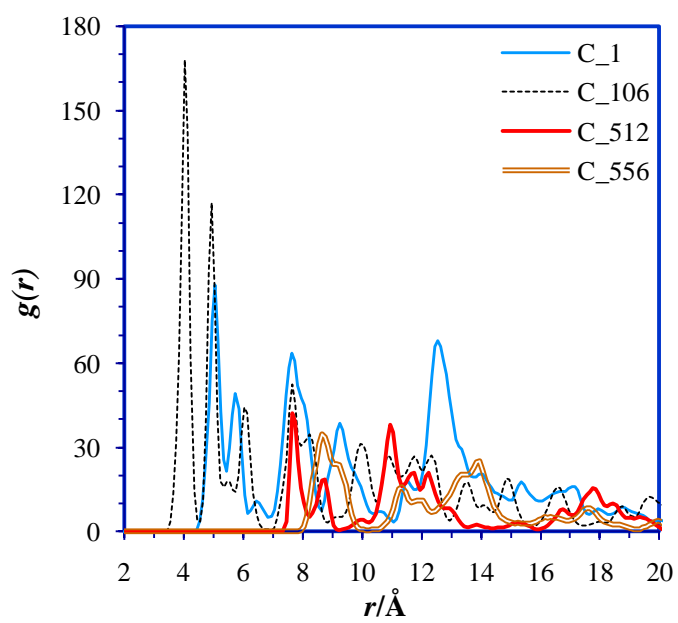

**Figure S27.** The same as Figure S22, but for  $C_6$ .

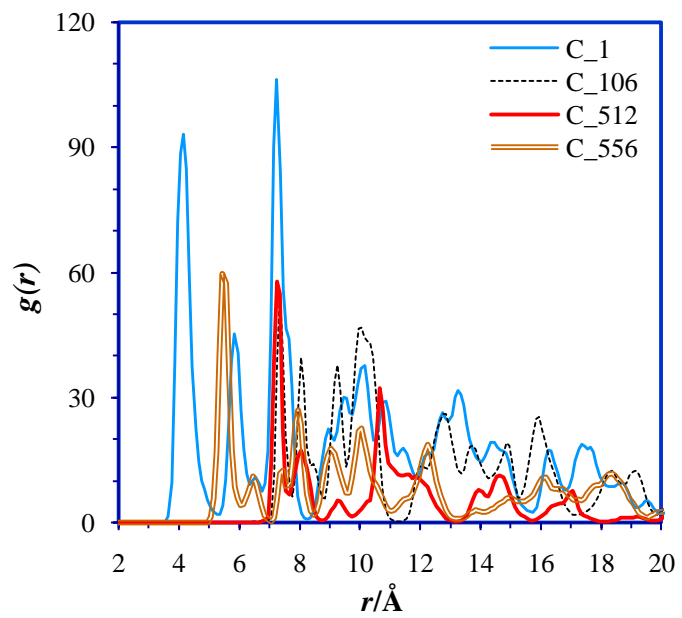

**Figure S28.** The same as Figure S22, but for C<sub>7</sub>.

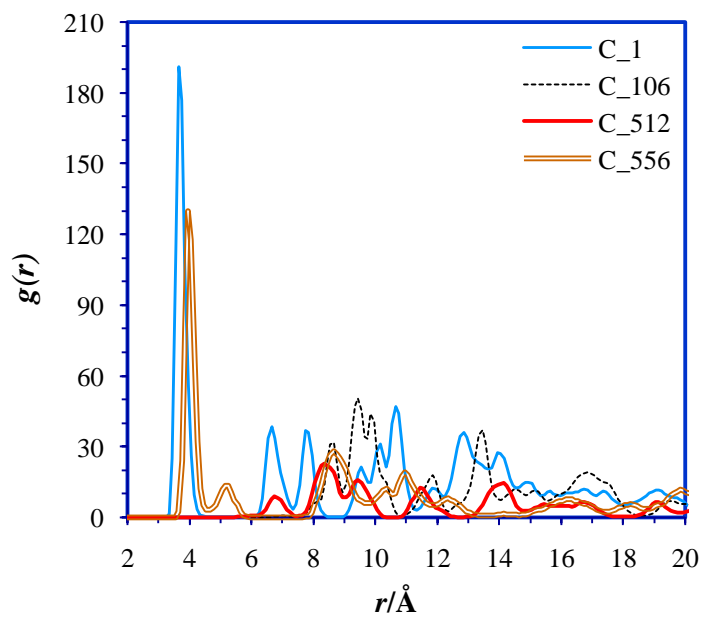

**Figure S29.** The same as Figure S22, but for C<sub>10</sub>.

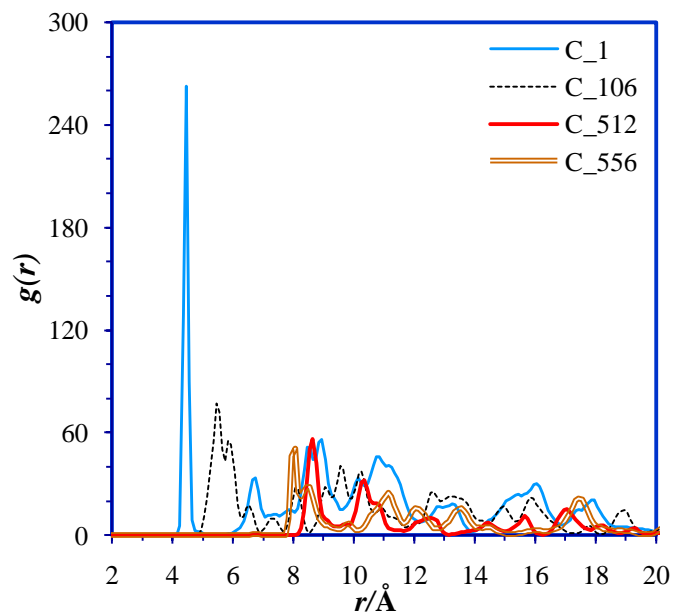

**Figure S30.** The same as Figure S22, but for P.

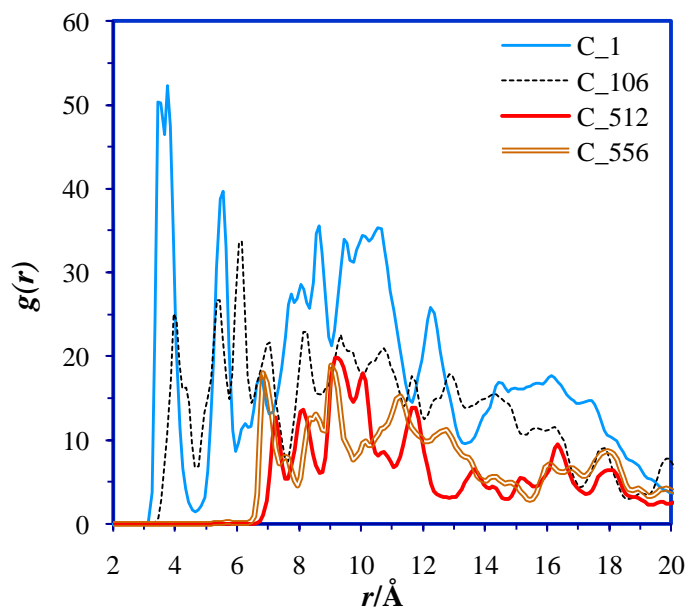

**Figure S31.** The same as Figure S22, but for F.

**IL Intercalated between Graphite Uncharged Plates: Figures S32-S41**

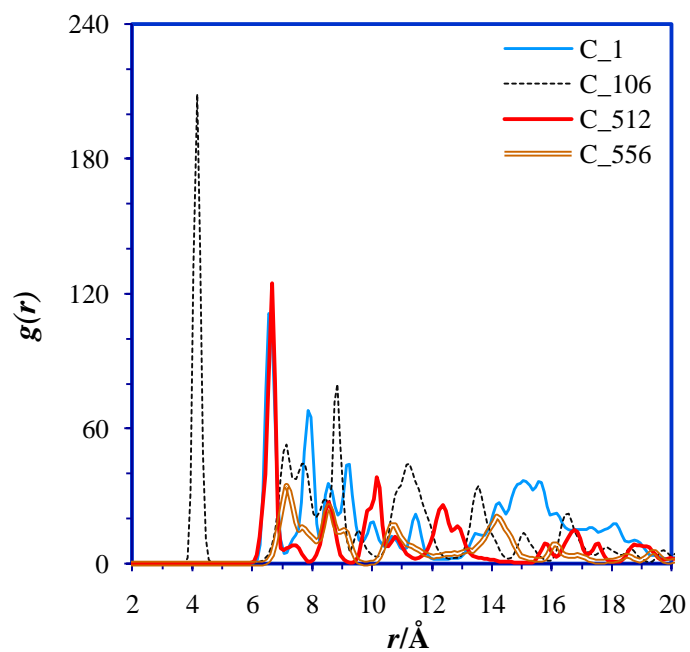

**Figure S32.** Pair correlation functions (at 323 K) between  $N_1$  atom of monolayer IL and carbon atoms at different locations in between double- $C_{600}$  graphite uncharged plates.

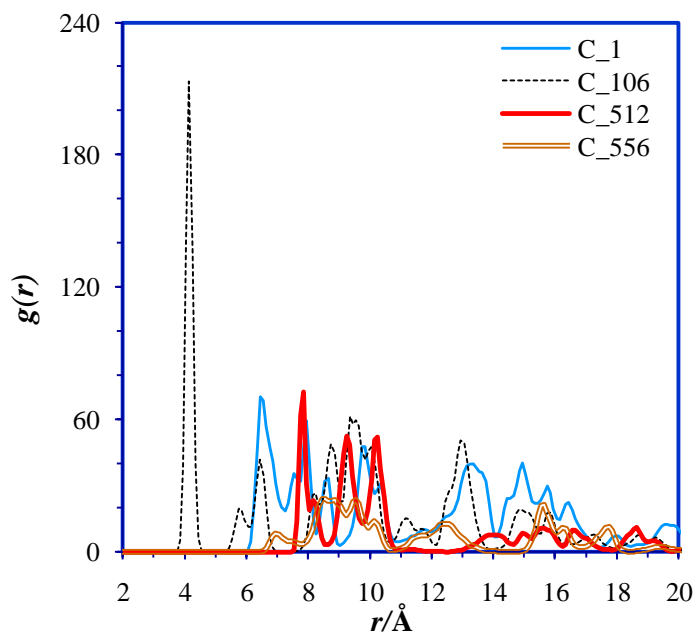

**Figure S33.** The same as Figure S32, but for  $N_3$ .

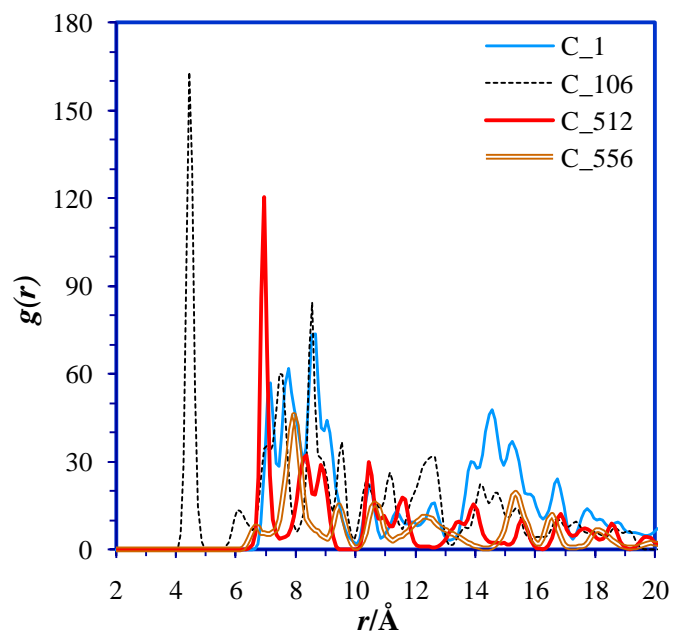

**Figure S34.** The same as Figure S32, but for  $C_2$ .

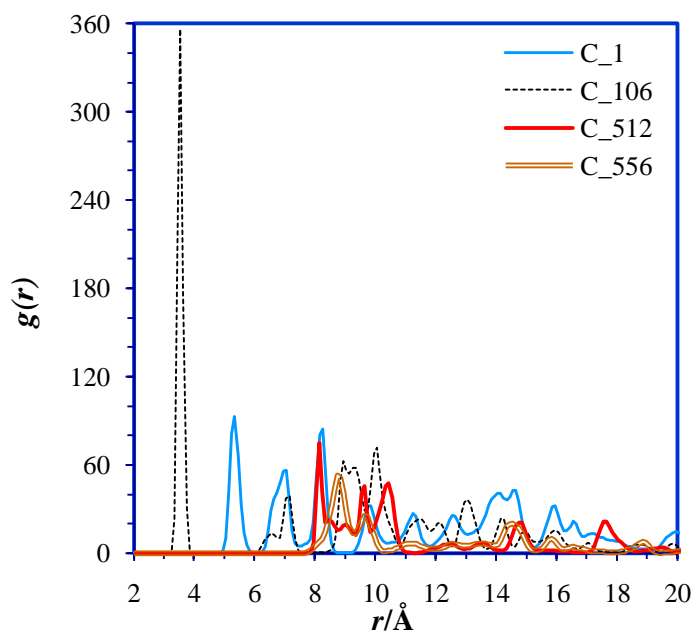

**Figure S35.** The same as Figure S32, but for  $C_4$ .

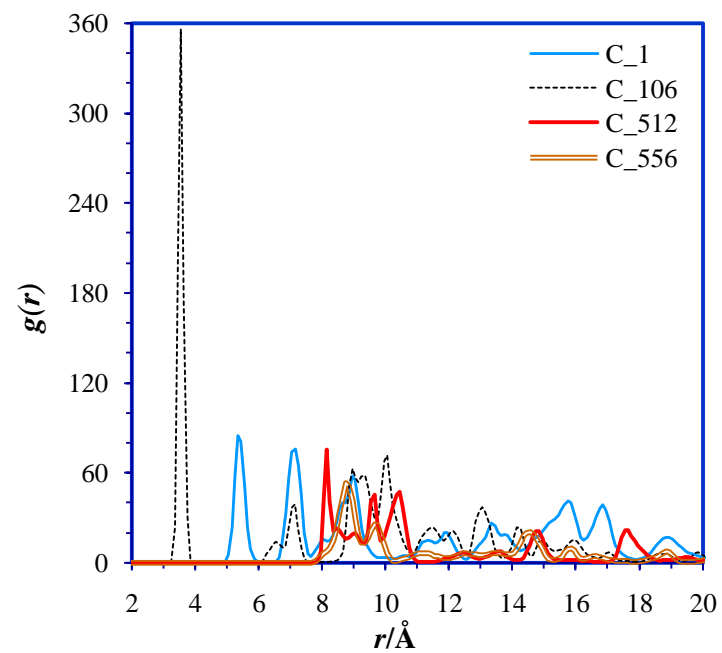

**Figure S36.** The same as Figure S32, but for  $C_5$ .

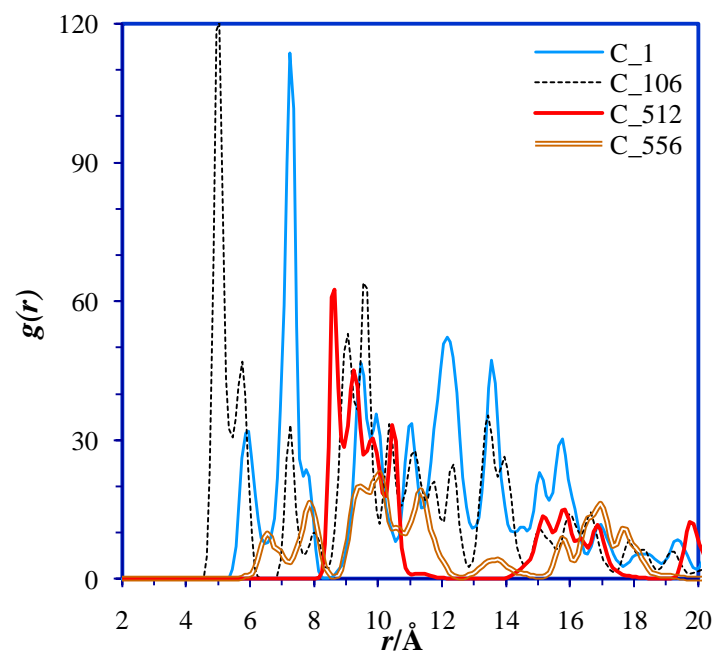

**Figure S37.** The same as Figure S32, but for  $C_6$ .

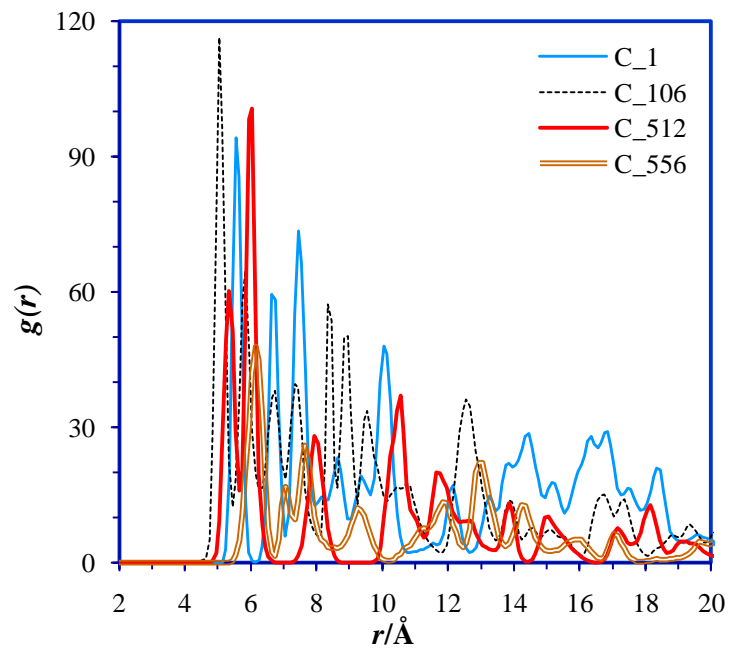

**Figure S38.** The same as Figure S32, but for  $C_7$ .

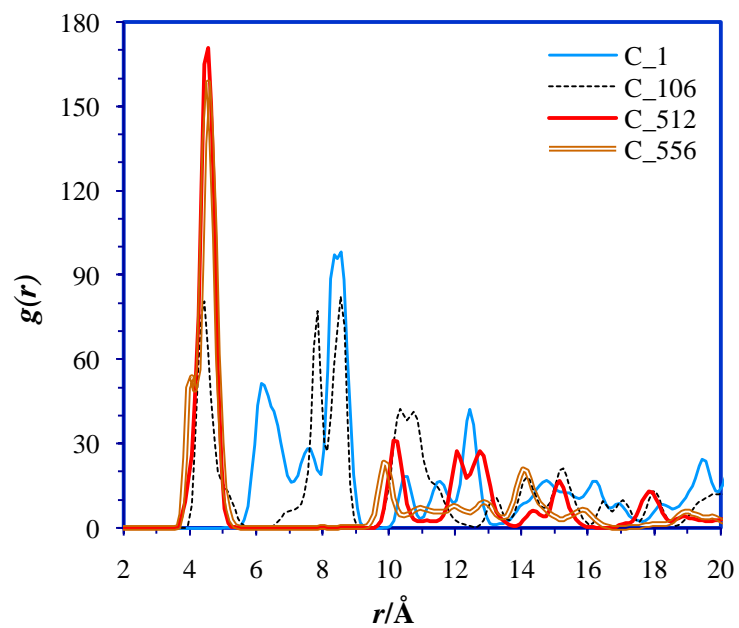

**Figure S39.** The same as Figure S32, but for  $C_{10}$ .

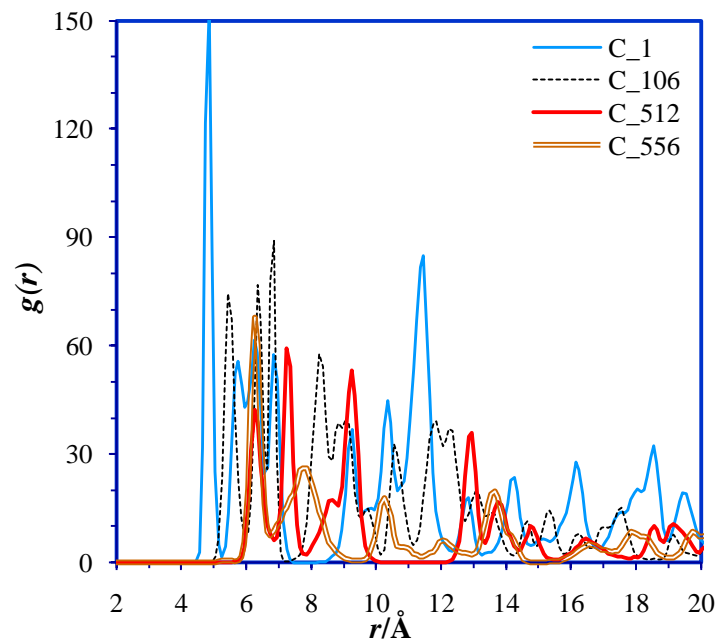

**Figure S40.** The same as Figure S32, but for P.

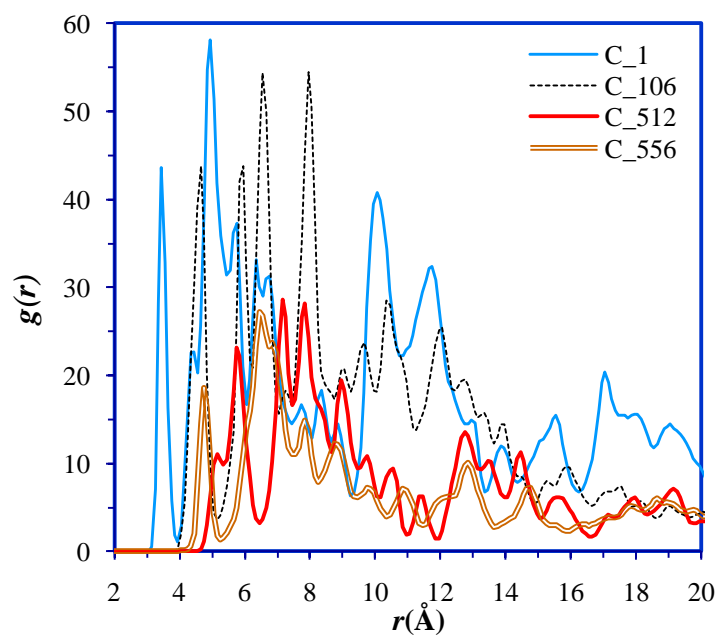

**Figure S41.** The same as Figure S32, but for F.



Paraffin on Graphite Uncharged Plates: Figures 42 and 43

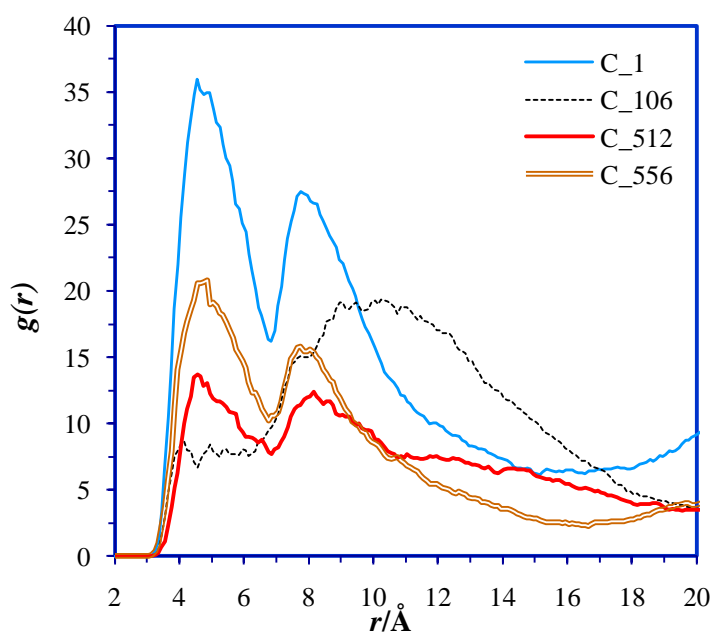

**Figure S42.** Pair correlation functions (at 323 K) between  $C_{P1}$  atom of monolayer IL and carbon atoms at different locations on double- $C_{600}$  graphite uncharged plates.

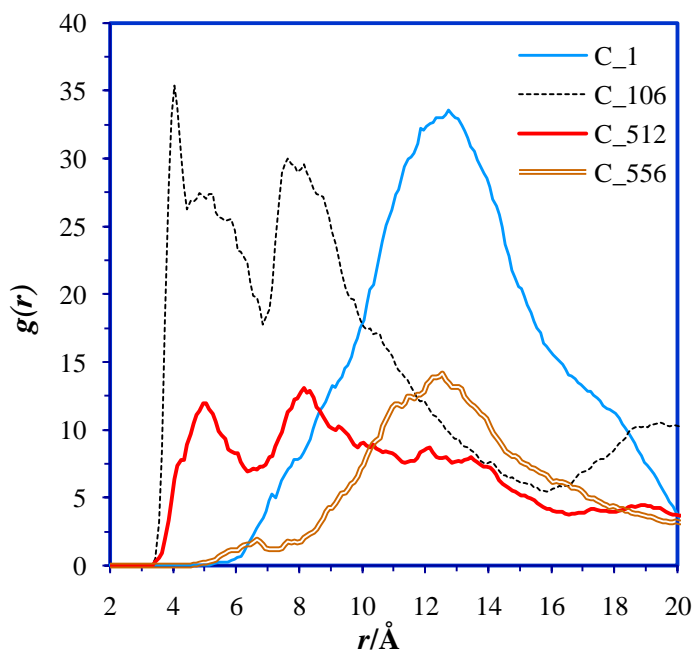

**Figure S43.** The same as Figure S42 but for  $C_{P10}$ .

Paraffin Intercalated between Graphite Uncharged Plates: Figures 44 and 45

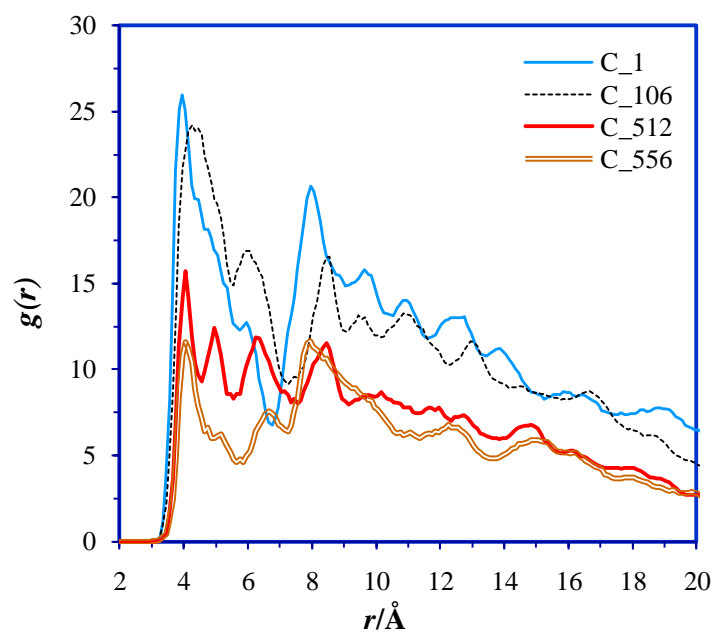

**Figure S44.** Pair correlation functions (at 323 K) between  $C_{p1}$  atom of monolayer IL and carbon atoms at different locations in between double- $C_{600}$  graphite uncharged plates.

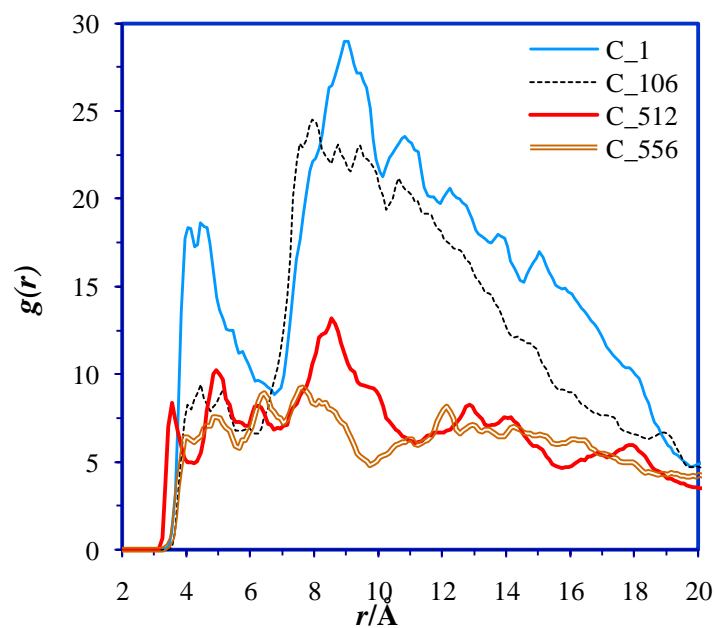

**Figure S45.** The same as Figure S44 but for  $C_{p10}$ .
